# Supplementary material for: Colon Expression of Chemokines and Their Receptors Depending on the Stage of Colitis and Oat Beta-Glucan Dietary Intervention—Crohn’s Disease Model Study
Source: MDPI journal article supplement (doi:10.3390/ijms23031406), 2022-01-26
Supplement: s1 [file s1]

## Supplementary figures

### The gene expression of chemokines

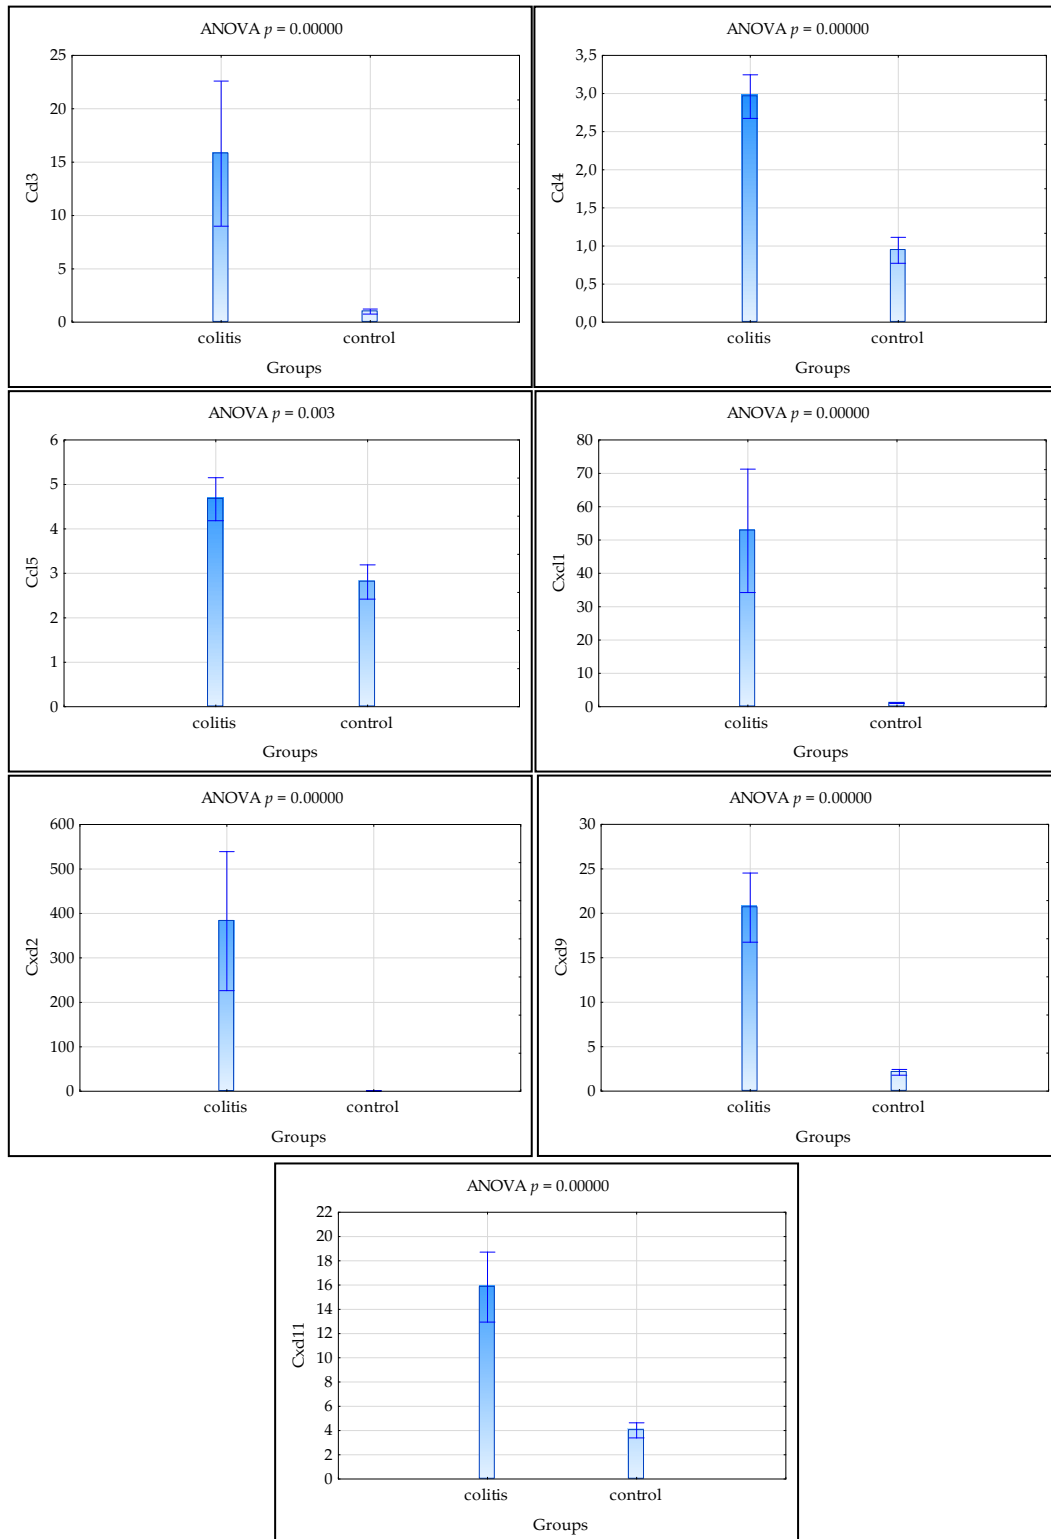

**Figure S1.** Changes of gene expression of selected chemokines (mean  $\pm$  SE) by influence of inflammation. ANOVA analysis.

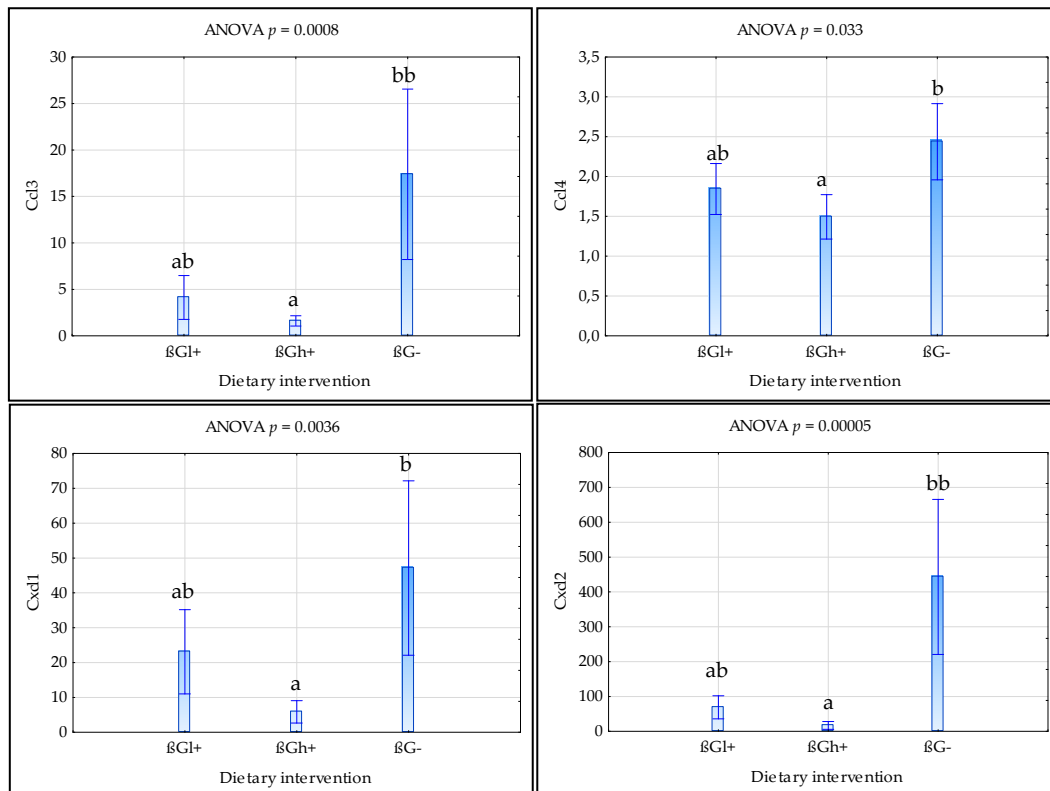

**Figure S2.** Changes of gene expression of selected chemokines (mean ± SE) by influence of dietary intervention. ANOVA analysis. <sup>a,b</sup> Different letters denote significant differences between dietary group according to the Tukey post-hoc test (<sup>a,b</sup>  $p < 0.05$ , <sup>a,bb</sup>  $p < 0.01$ ).

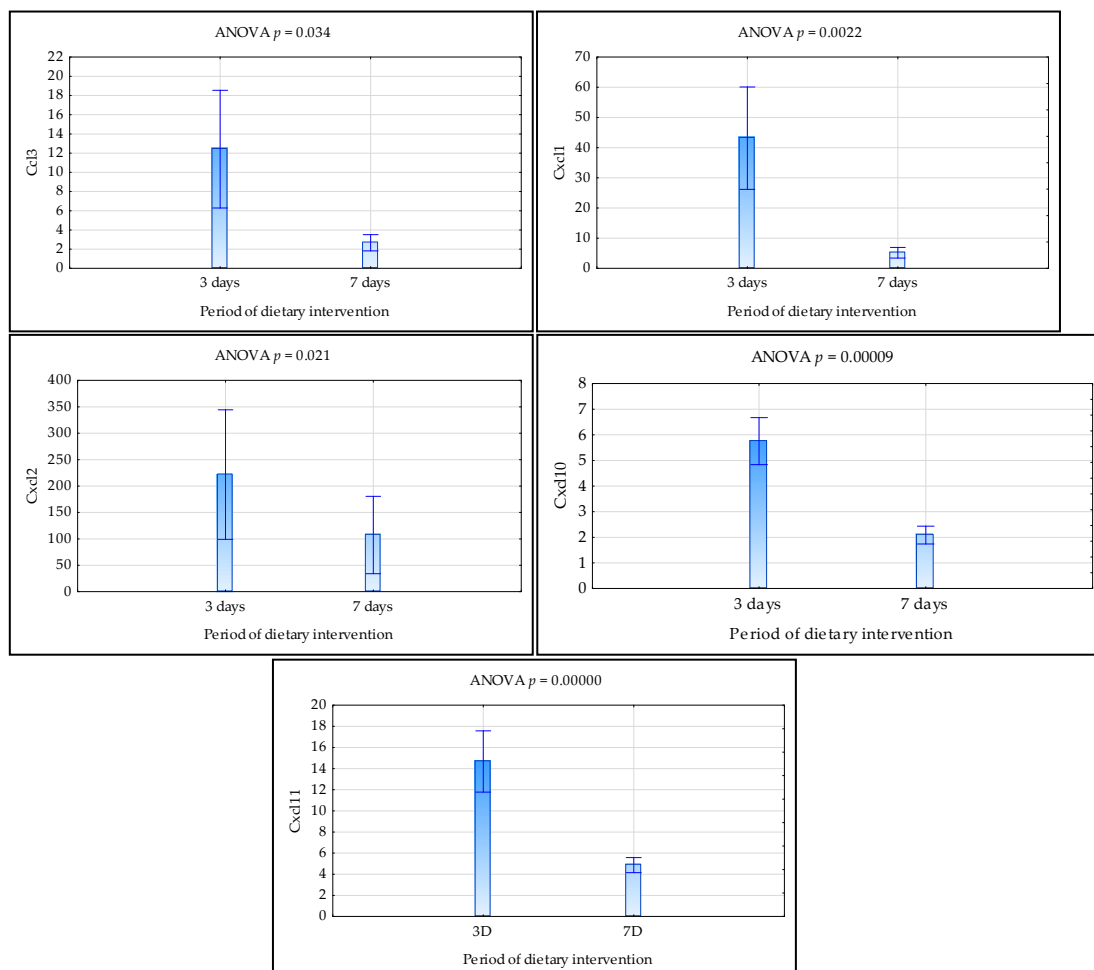

**Figure S3.** Changes of gene expression of selected chemokines (mean ± SE) by influence of the period of dietary intervention. ANOVA analysis.

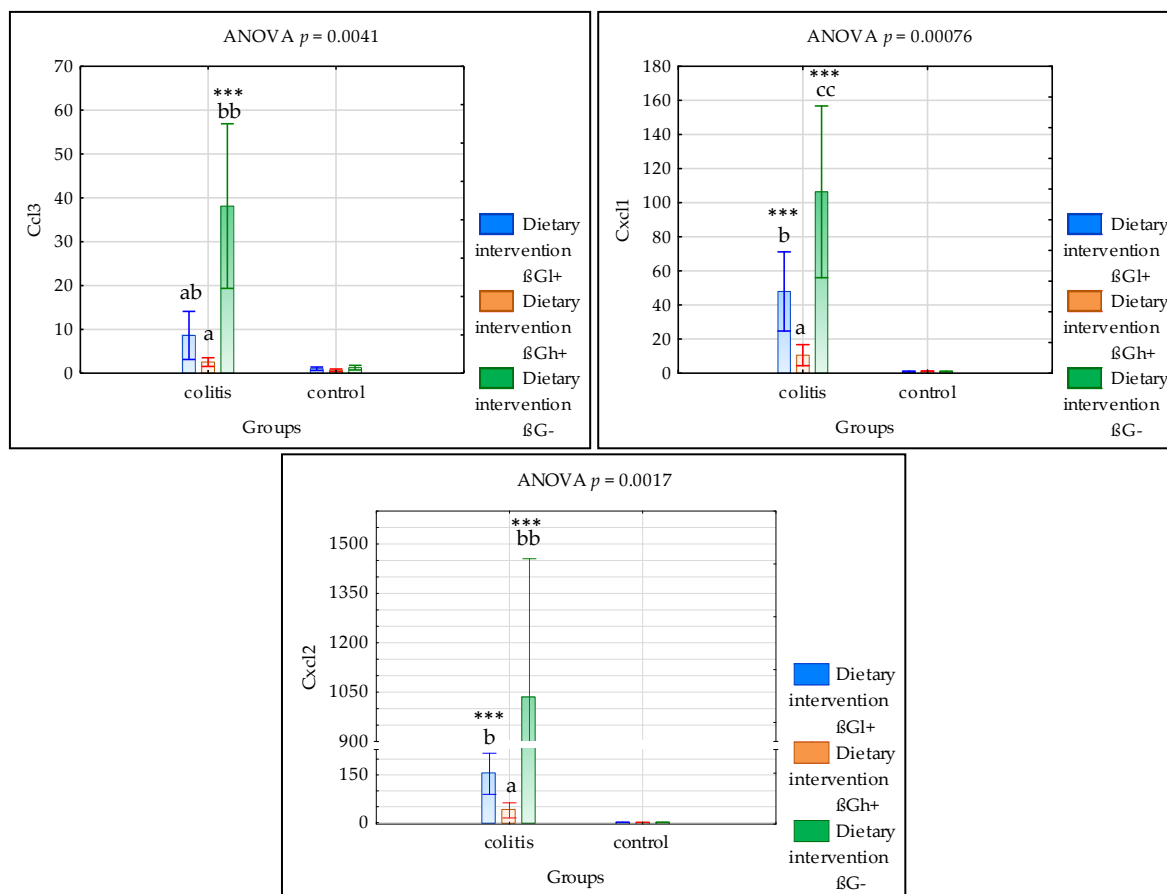

**Figure S4.** Changes of gene expression of selected chemokines (mean  $\pm$  SE) by influence of interaction between the period of inflammation and dietary intervention. ANOVA analysis. <sup>a,b</sup> Different letters denote significant differences between dietary groups in the *colitis* group according to the Tukey post-hoc test (a,b  $p < 0.05$ , a,bb/cc  $p < 0.001$ ). \* Significantly different from control group (control  $\beta G-$ ) according to the Tukey post-hoc test (\*\* $p < 0.001$ ).

### The gene expression of chemokine receptors

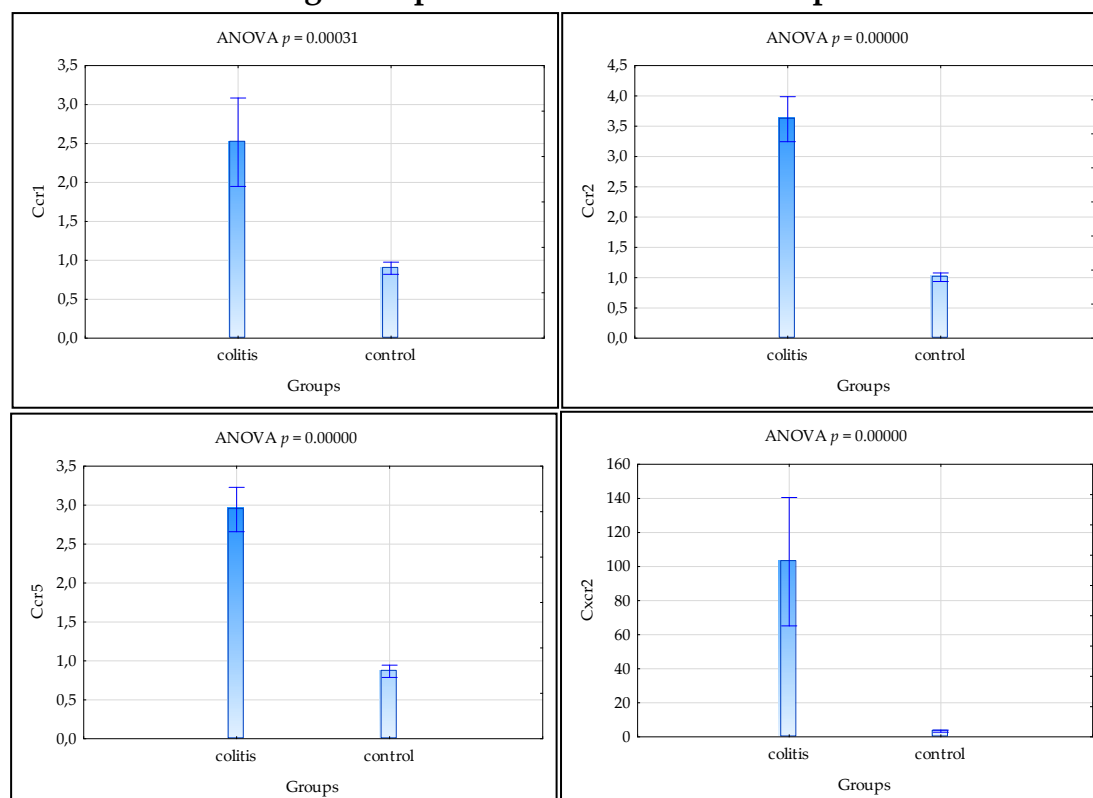

**Figure S5.** Changes of gene expression of selected chemokine receptors (mean  $\pm$  SE) by influence of inflammation. ANOVA analysis.

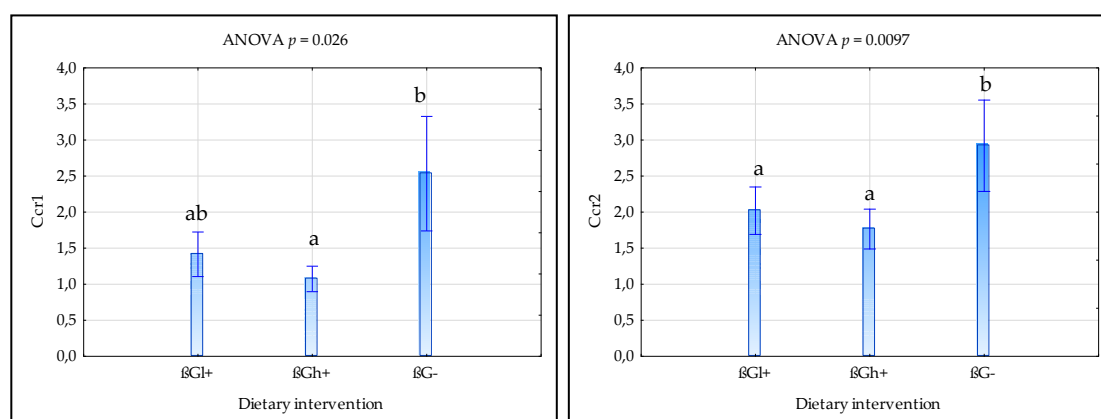

**Figure S6.** Changes of gene expression of selected chemokine receptors (mean ± SE) by influence of dietary intervention. ANOVA analysis. <sup>a,b</sup> Different letters denote significant differences between dietary group according to the Tukey post-hoc test ( $a, b, p < 0.05$ ).

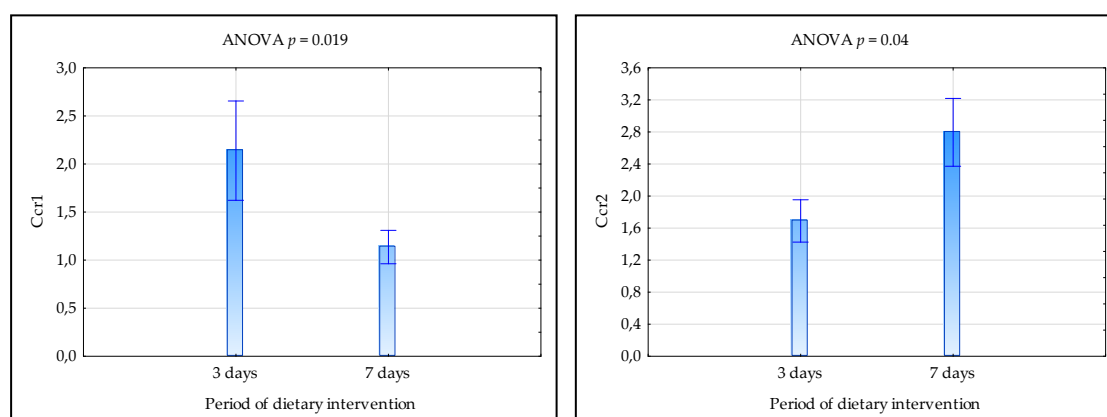

**Figure S7.** Changes of gene expression of selected chemokine receptors (mean ± SE) by influence of the period of dietary intervention. ANOVA analysis.

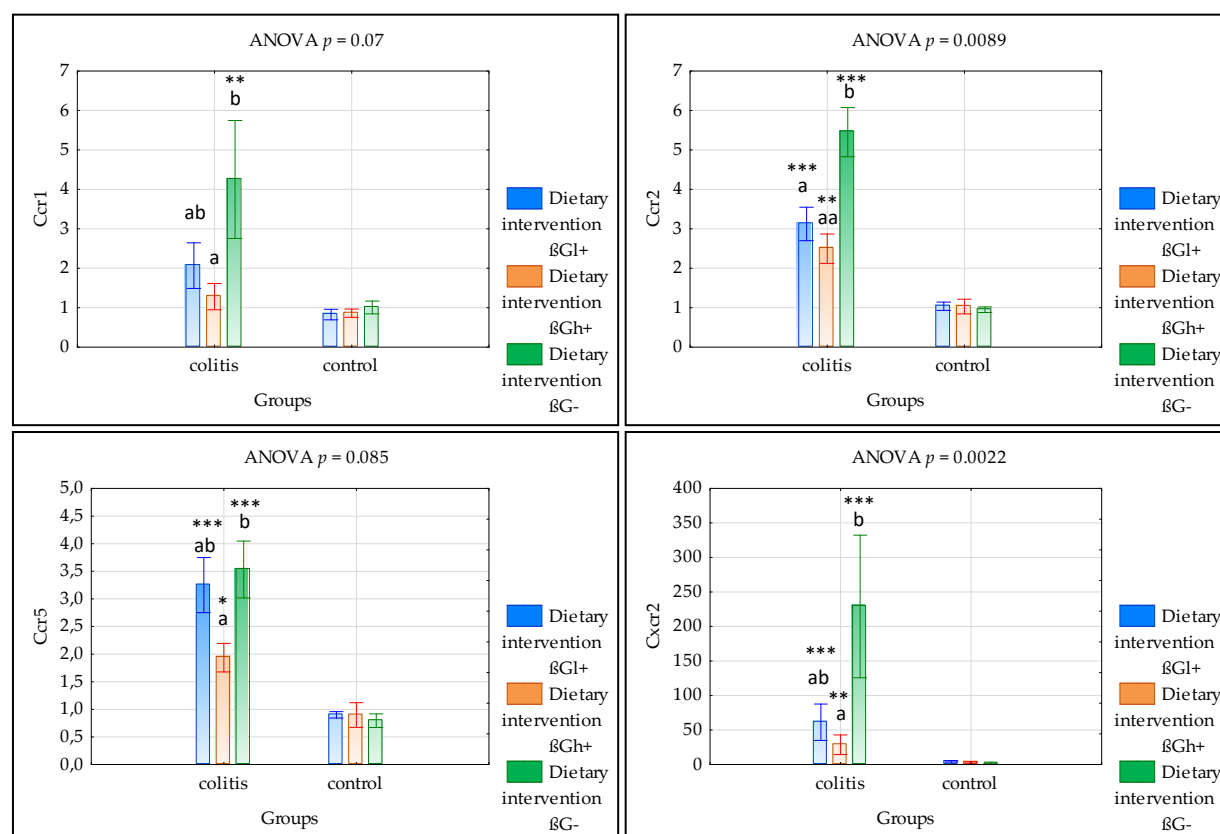

**Figure S8.** Changes of gene expression of selected chemokine receptors (mean ± SE) by influence of interaction between the period of inflammation and dietary intervention. ANOVA analysis. <sup>a,b</sup> Different letters denote significant between

dietary groups in the *colitis* group according to the Tukey post-hoc test (a,b  $p < 0.05$ , a,bb/cc  $p < 0.001$ ). \* Significantly different from control group (control  $\beta G^-$ ) according to the Tukey post-hoc test (\*  $p < 0.05$ , \*\*  $p < 0.01$ , \*\*\*  $p < 0.001$ ).

### *Osm*, *Csf3* and *Spp1* gene expression

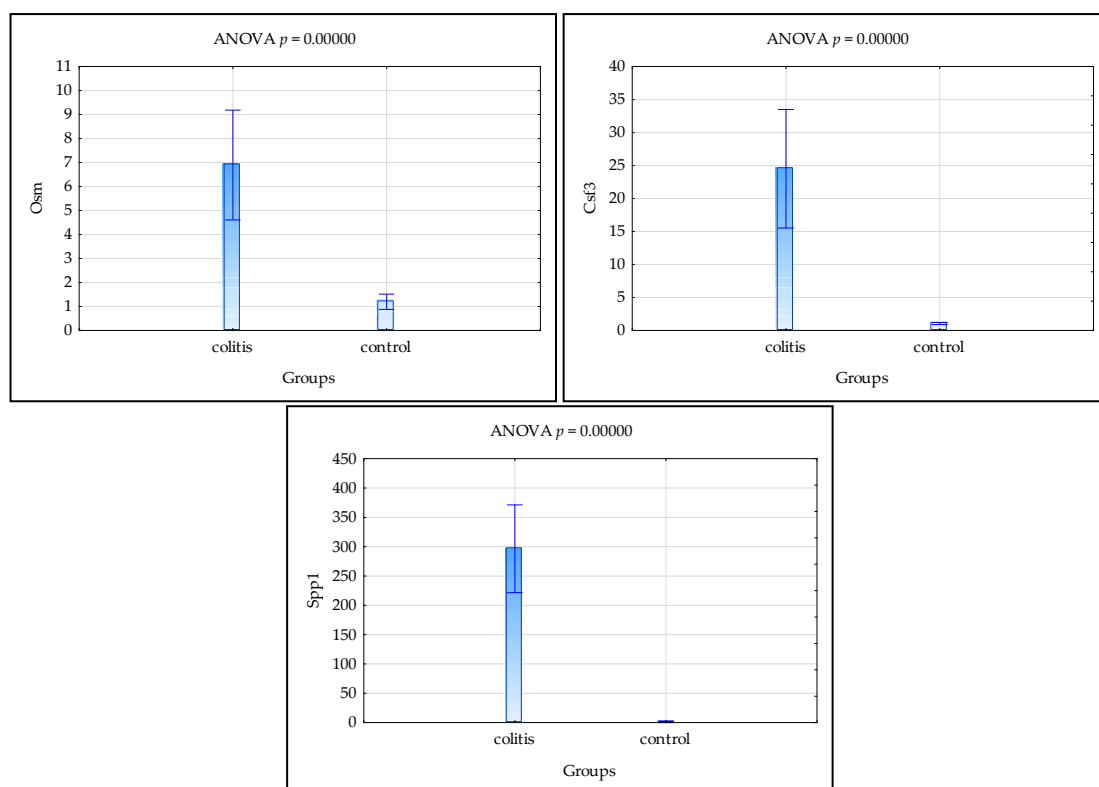

**Figure S9.** Changes of gene expression of *Osm*, *Csf3* and *Spp1* (mean  $\pm$  SE) by influence of inflammation. ANOVA analysis.

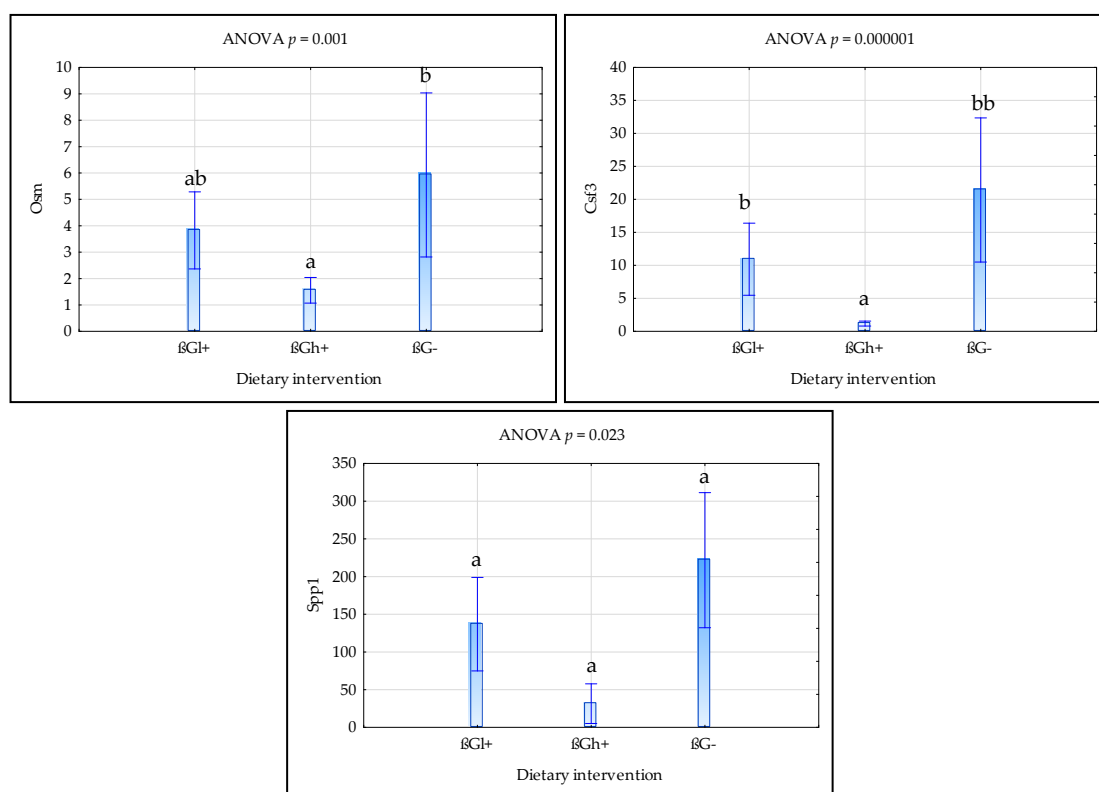

**Figure S10.** Changes of gene expression of *Osm*, *Csf3* and *Spp1* (mean  $\pm$  SE) by influence of dietary intervention. ANOVA analysis. <sup>a,b</sup> Different letters denote significant differences between dietary group according to the Tukey post-hoc test (a,b  $p < 0.05$ , a,bb  $p < 0.01$ ).

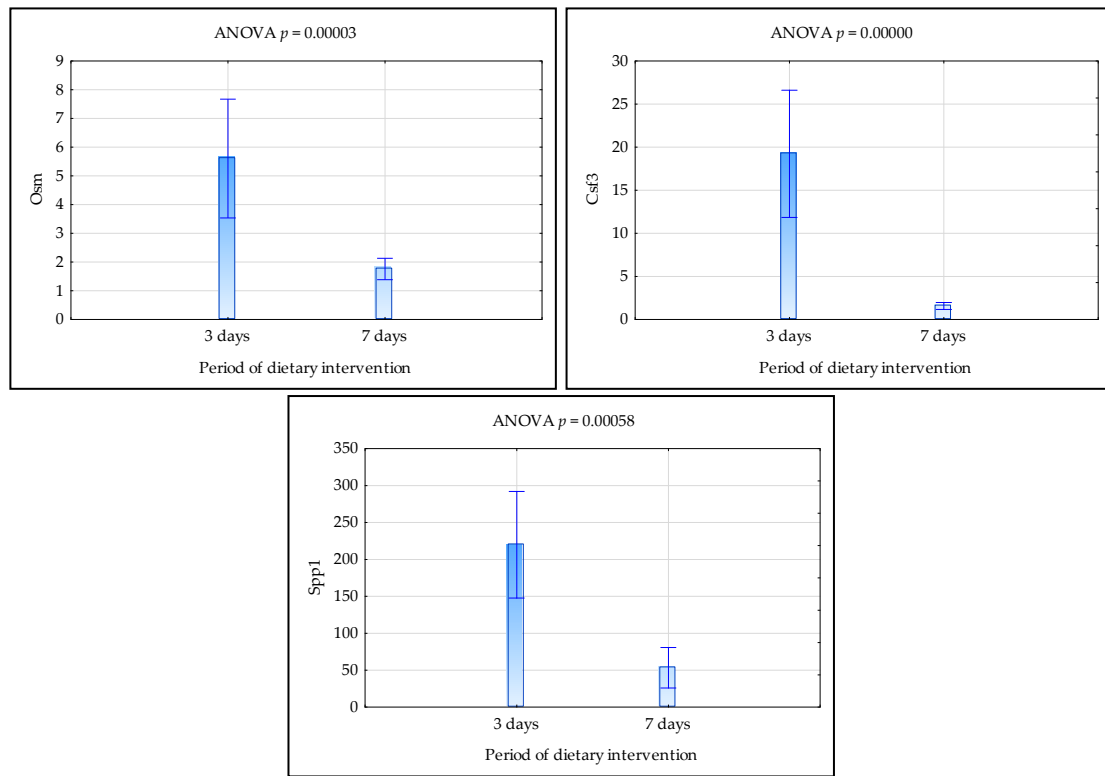

**Figure S11.** Changes of gene expression of *Osm*, *Csf3* and *Spp1* (mean  $\pm$  SE) by influence of the period of dietary intervention. ANOVA analysis.

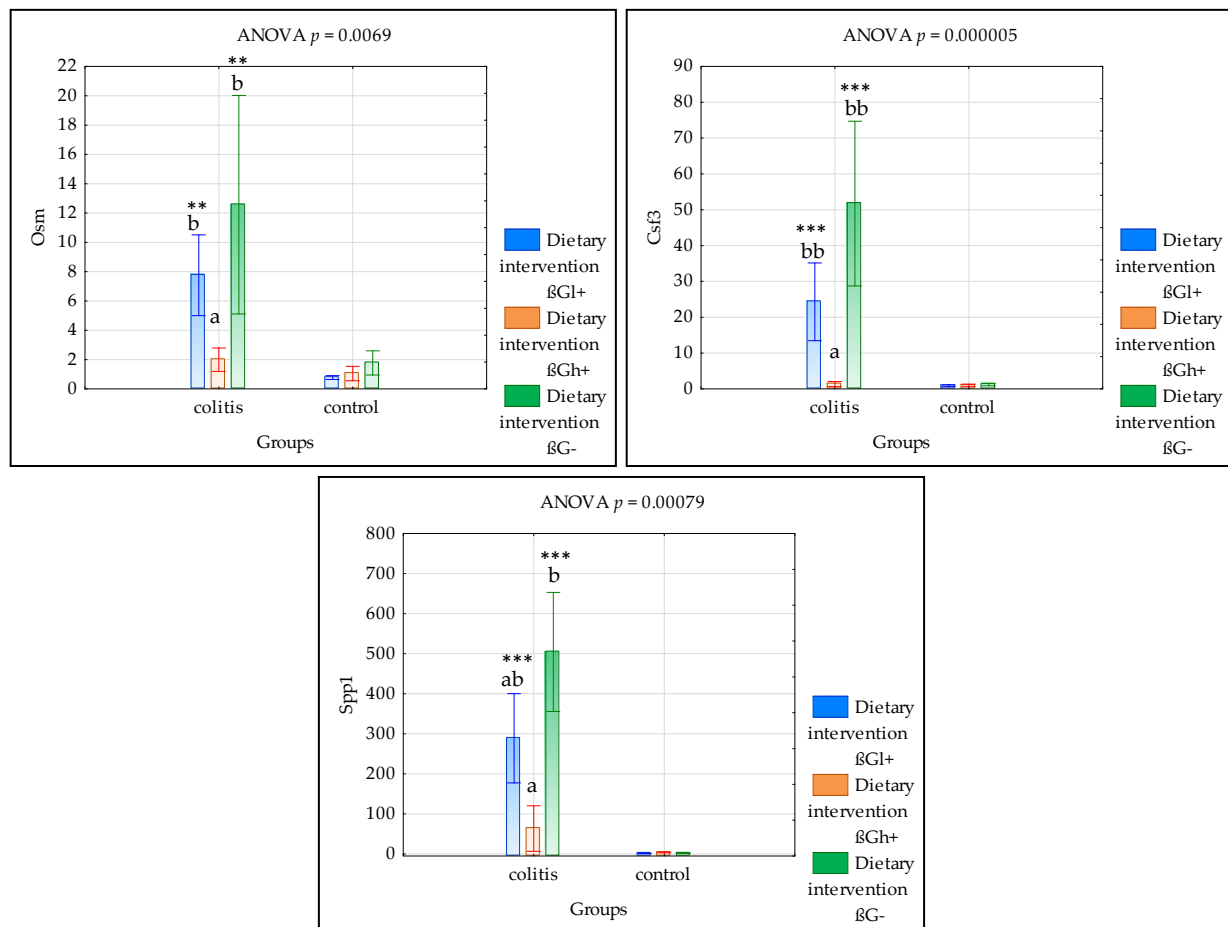

**Figure S12.** Changes of gene expression of *Osm*, *Csf3* and *Spp1* (mean  $\pm$  SE) by influence of interaction between the period of inflammation and dietary intervention. ANOVA analysis. <sup>a,b</sup> Different letters denote significant between dietary groups in the *colitis* group according to the Tukey post-hoc test (a,b  $p < 0.01$ , a,bb  $p < 0.001$ ). \* Significantly different from control group (control  $\beta G-$ ) according to the Tukey post-hoc test (\*\*  $p < 0.01$ , \*\*\*  $p < 0.001$ ).

## Chemokines and their receptors expression in the colon mucosa

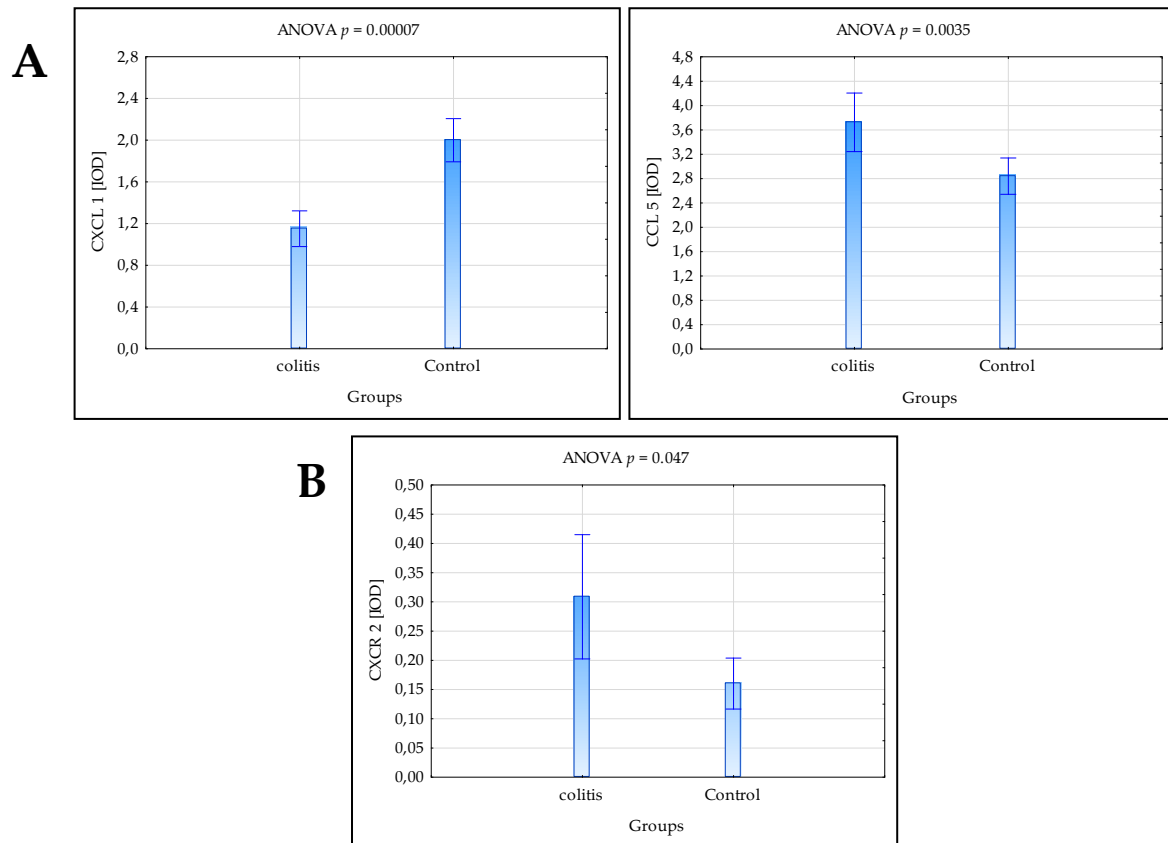

**Figure S13.** Changes expression of CXCL1 and CCL5 chemokines (**A**) and CXCR2 receptor (**B**) (mean  $\pm$  SE) by influence of inflammation. ANOVA analysis

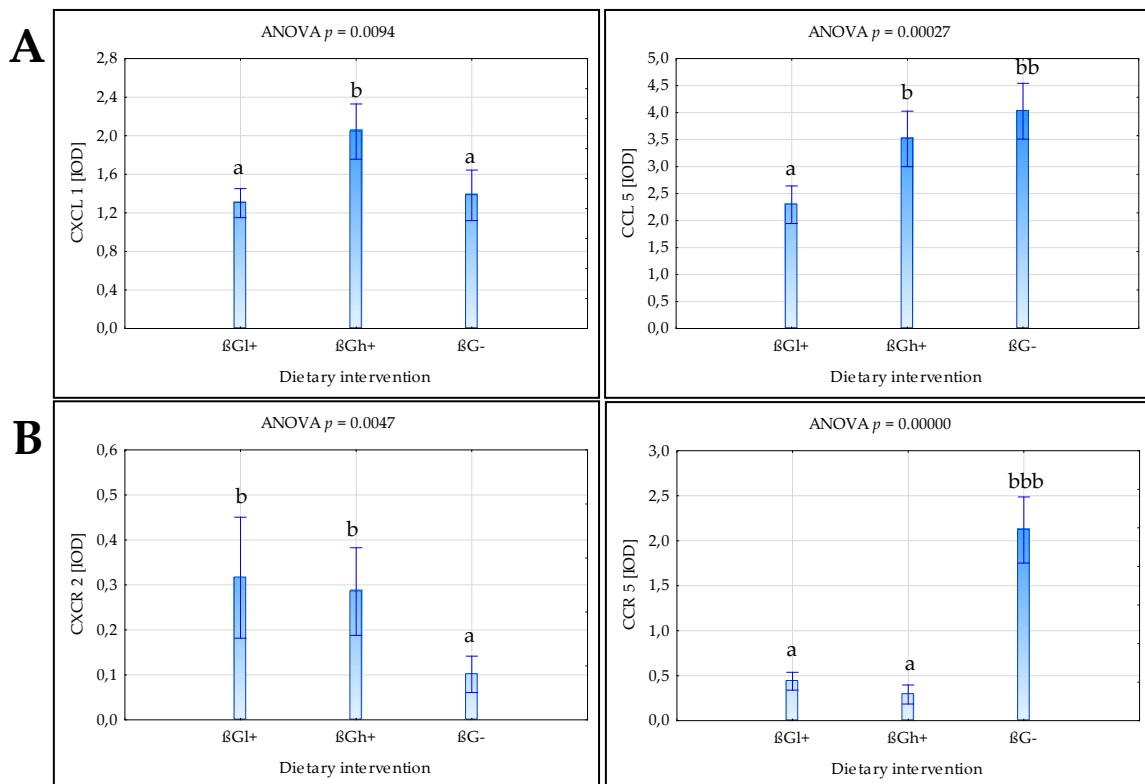

**Figure S14.** Changes expression of CXCL1 and CCL5 chemokines (**A**) and CXCR2 and CCR5 receptors (**B**) (mean  $\pm$  SE), by influence of dietary intervention. ANOVA analysis. <sup>a,b</sup> Different letters denote significant differences between dietary group according to the Tukey post-hoc test (<sup>a,b</sup>  $p < 0.05$ , <sup>a,bb</sup>  $p < 0.01$ , <sup>a,bbb</sup>  $p < 0.001$ ).

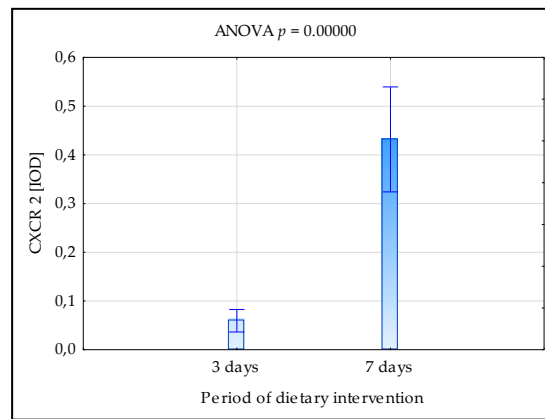

**Figure S15.** Changes expression of CXCR2 receptor (mean  $\pm$  SE) by influence of the period of dietary intervention. ANOVA analysis.

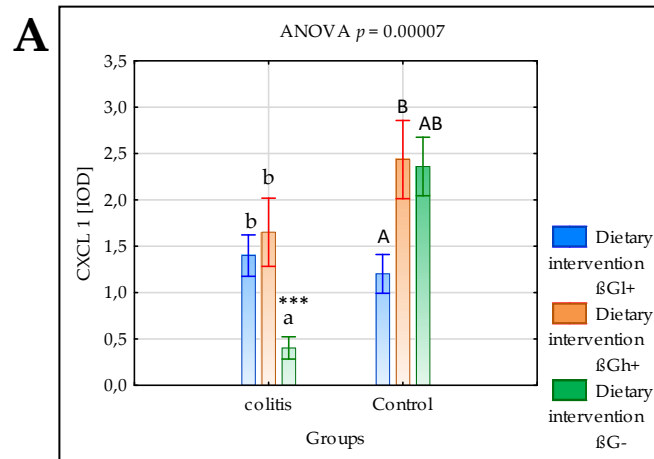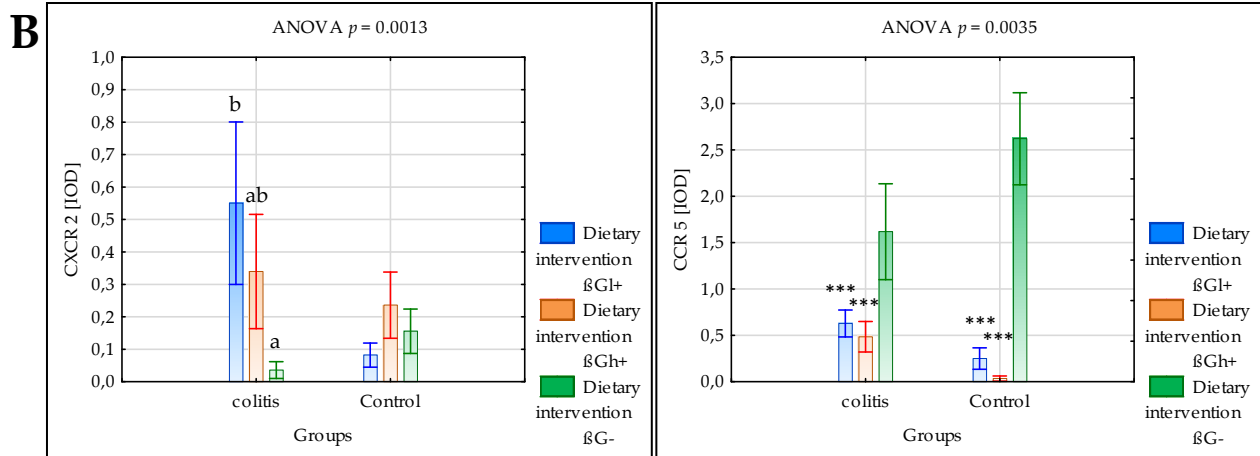

**Figure S16.** Changes expression of CXCL1 chemokine (A) and CXCR2 and CCR5 receptors (B) (mean  $\pm$  SE) by influence of interaction between the period of inflammation and dietary intervention. ANOVA analysis. <sup>a,b</sup> Different letters denote significant between dietary groups in the *colitis* group according to the Tukey post-hoc test ( $a, b, p < 0.01$ ). <sup>A,B</sup> Different large letters denote significant between dietary groups in the control group according to the Tukey post-hoc test ( $A, B, p < 0.05$ ). \* Significantly different from control group (control βG-) according to the Tukey post-hoc test ( $*** p < 0.001$ ).



### Osteopontin (OPN) expression in the colon mucosa

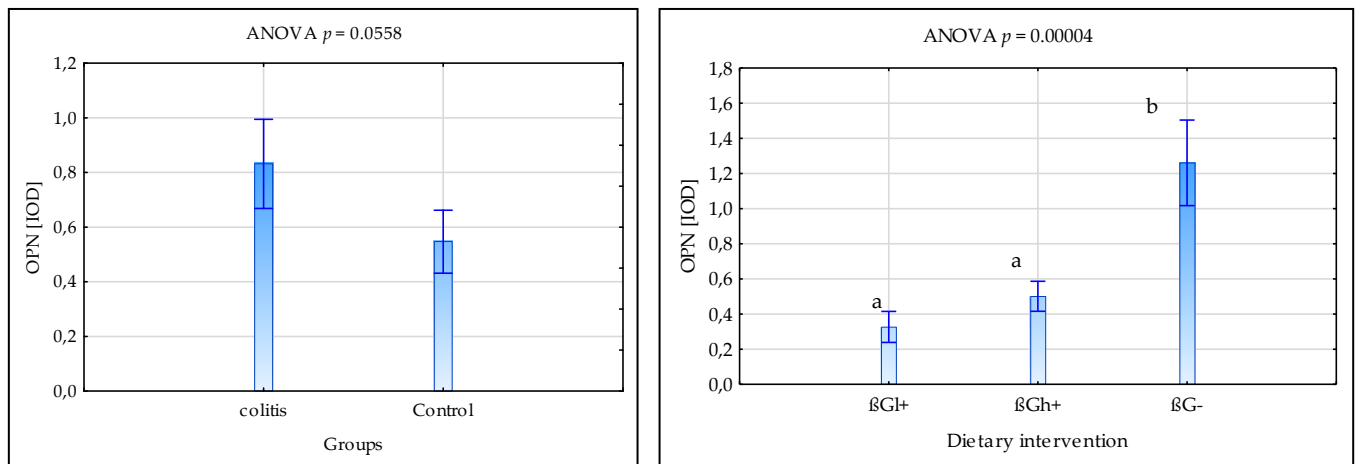

**Figure S17.** Changes expression of OPN (mean  $\pm$  SE) by influence of inflammation (**A**) and influence of dietary intervention (**B**). ANOVA analysis. <sup>a,b</sup> Different letters denote significant differences between dietary group according to the Tukey post-hoc test ( $a, b, p < 0.01$ ).

|        | CβG- vs HβG-                                                                                                                                                                                                            | CβGI+ vs CβG-                                                                                                                                                        | CβGH+ vs CβG-                                                                                                                                                             | HβGI+ vs HβG-                                                                          | HβGH+ vs HβG-                                                                                                                                      |
|--------|-------------------------------------------------------------------------------------------------------------------------------------------------------------------------------------------------------------------------|----------------------------------------------------------------------------------------------------------------------------------------------------------------------|---------------------------------------------------------------------------------------------------------------------------------------------------------------------------|----------------------------------------------------------------------------------------|----------------------------------------------------------------------------------------------------------------------------------------------------|
| 3 days | <b>Σ 23 gens</b><br><u>CCL and CCR:</u> <i>Ccl2, Ccl3, Ccl4, Ccl7, Ccl12, Ccl17, Ccl19, Cxcl1, Cxcl2, Cxcl6, Cxcl9, Ccr1, Ccr2, Ccr3, Ccr4, Ccr5, Ccr8, Cxcr2, Cxcr3, Cxcr5</i><br><u>Other:</u> <i>Csf3, Osm, Spp1</i> | <b>Σ 3 gens</b><br><u>CCL:</u> <i>Ccl10, Cxcl11, Cxcl9</i>                                                                                                           | <b>Σ 3 gens</b><br><u>CCL:</u> <i>Ccl20, Ccl24, Cx3cl1</i>                                                                                                                | <b>Σ 4 gens</b><br><u>CCL and CCR:</u> <i>Cx3cl1, Ccr8, Cxcr3, Cxcr5,</i>              | <b>Σ 8 gens</b><br><u>CCL and CCR:</u> <i>Ccl4, Ccl19, Ccl20, Cx3cl1, Ccr4, Ccr8, Cxcr3, Cxcr5</i>                                                 |
|        | <b>Σ 2 gens</b><br><u>CCL and CCR:</u> <i>Cx3cl1, Ccr10</i>                                                                                                                                                             | <b>Σ 15 gens</b><br><u>CCL and CCR:</u> <i>Ccl3, Ccl4, Ccl19, Ccl22, Cxcl2, Ccr1, Ccr4, Ccr6, Ccr8, Cxcr1, Cxcr2, Cxcr3, Cxcr5</i><br><u>Other:</u> <i>Csf3, Osm</i> | <b>Σ 16 gens</b><br><u>CCL and CCR:</u> <i>Ccl2, Ccl3, Ccl4, Ccl7, Ccl19, Cxcl1, Cxcl2, Cxcl6, Ccr1, Ccr2, Ccr5, Cxcr1, Cxcr2</i><br><u>Other:</u> <i>Csf3, Osm, Spp1</i> |                                                                                        |                                                                                                                                                    |
| 7 days | <b>Σ 22 gens</b><br><u>CCL and CCR:</u> <i>Ccl2, Ccl3, Ccl4, Ccl5, Ccl6, Ccl7, Ccl12, Ccl17, Cxcl1, Cxcl2, Cxcl6, Cxcl9, Cxcl11, Ccr1, Ccr2, Ccr3, Ccr5, Ccr8, Cxcr2</i><br><u>Other:</u> <i>Csf3, Osm, Spp1</i>        | <b>Σ 4 gens</b><br><u>CCL and CCR:</u> <i>Ccl19, Cxcl10, Cx3cr1, Cxcr5</i>                                                                                           | <b>Σ 4 gens</b><br><u>CCL and CCR:</u> <i>Ccl19, Cxcl9, Ccr4, Ccr8</i>                                                                                                    | <b>Σ 6 gens</b><br><u>CCL and CCR:</u> <i>Ccl5, Ccl12, Ccl17, Cxcl9, Cxcl11, Cxcr2</i> | <b>Σ 3 gens</b><br><u>CCL and CCR:</u> <i>Ccl5, Cxcl11, Cxcr2</i>                                                                                  |
|        | <b>Σ 4 gens</b><br><u>CCL and CCR:</u> <i>Ccl19, Ccl20, Cx3cl1, Cxcr5</i>                                                                                                                                               | <b>Σ 6 gens</b><br><u>CCL:</u> <i>Ccl20, Cxcl1, Cxcl2</i><br><u>Other:</u> <i>Csf3, Osm, Spp1</i>                                                                    | <b>Σ 7 gens</b><br><u>CCL and CCR:</u> <i>Ccl3, Cxcl1, Cxcl2, Cxcr2</i><br><u>Other:</u> <i>Csf3, Osm, Spp1</i>                                                           | <b>Σ 4 gens</b><br><u>CCL and CCR:</u> <i>Cx3cl1, Ccr1, Ccr2, Cx3cr1</i>               | <b>Σ 12 gens</b><br><u>CCL and CCR:</u> <i>Ccl3, Ccl9, Ccl19, Ccl20, Cxcl2, Cxcl6, Ccr4, Ccr6, Ccr8, Cx3cr1, Cxcr5</i><br><u>Other:</u> <i>Osm</i> |

**Table S1.** Changes in gene expression 3 and 7 days after TNBS administration. Regulation of genes encode chemokines and their receptors and other colon inflammation-related proteins in the colon tissue. Results are reported as fold regulation > 2.

Chemokines and their receptors: chemokine (C-C motif) ligand 2 (*Ccl2*), chemokine (C-C motif) ligand 3 (*Ccl3*), chemokine (C-C motif) ligand 4 (*Ccl4*), chemokine (C-C motif) ligand 5 (*Ccl5*), chemokine (C-C motif) ligand 6 (*Ccl6*), chemokine (C-C motif) ligand 7 (*Ccl7*), chemokine (C-C motif) ligand 9 (*Ccl9*), chemokine (C-C motif) ligand 12 (*Ccl12*), chemokine (C-C motif) ligand 17 (*Ccl17*), chemokine (C-C motif) ligand 19 (*Ccl19*), chemokine (C-C motif) ligand 20 (*Ccl20*), chemokine (C-C motif) ligand 22 (*Ccl22*), chemokine (C-C motif) ligand 24 (*Ccl24*), chemokine (C-X3-C motif) ligand 1 (*Cx3cl1*), chemokine (C-X-C motif) ligand 1 (melanoma growth stimulating activity, alpha) (*Cxcl1*), chemokine (C-X-C motif) ligand 2 (*Cxcl2*), chemokine (C-X-C motif) ligand 6 (*Cxcl6*), chemokine (C-X-C motif) ligand 9 (*Cxcl9*), chemokine (C-X-C motif) ligand 10 (*Cxcl10*), chemokine (C-X-C motif) ligand 11 (*Cxcl11*), chemokine (C-C motif) receptor 1 (*Ccr1*), chemokine (C-C motif) receptor 2, (*Ccr2*), chemokine (C-C motif) receptor 3 (*Ccr3*), chemokine (C-C

motif) receptor 4 (*Ccr4*), chemokine (C-C motif) receptor 5 (*Ccr5*), chemokine (C-C motif) receptor 6 (*Ccr6*), chemokine (C-C motif) receptor 8 (*Ccr8*), chemokine (C-C motif) receptor 10 (*Ccr10*), Chemokine (C-X3-C motif) receptor 1 (*Cx3cr1*), chemokine (C-X-C motif) receptor 2 (*Cxcr2*), chemokine (C-X-C motif) receptor 3 (*Cxcr3*), chemokine (C-X-C motif) receptor 5 (*Cxcr5*)

Other: colony stimulating factor 3 (granulocyte) (*Csf3*), oncostatin M (*Osm*), secreted phosphoprotein 1 (*Spp1*),

**Table S2.** Relative gene expression of chemokines (Mean  $\pm$  SE). \* Significantly different from the control  $\beta$ G- group at the same time point according to the Dunnett post hoc test (\* $p < 0.05$ , \*\* $p < 0.01$ , \*\*\* $p < 0.001$ ).

| Time                 | 3 days         |             |            |             |             |            | 7 days         |             |            |             |             |            |
|----------------------|----------------|-------------|------------|-------------|-------------|------------|----------------|-------------|------------|-------------|-------------|------------|
| Colon inflammation   | <i>colitis</i> |             |            | control     |             |            | <i>colitis</i> |             |            | control     |             |            |
| Dietary intervention | $\beta$ GI+    | $\beta$ Gh+ | $\beta$ G- | $\beta$ GI+ | $\beta$ Gh+ | $\beta$ G- | $\beta$ GI+    | $\beta$ Gh+ | $\beta$ G- | $\beta$ GI+ | $\beta$ Gh+ | $\beta$ G- |
| <i>Ccl2</i>          | 4,108*         | 1,705       | 5,043**    | 0,666       | 0,582       | 0,642      | 1,711          | 2,428       | 1,530      | 1,484       | 0,679       | 1,000      |
| SE                   | 1,64           | 0,61        | 1,66       | 0,25        | 0,12        | 0,13       | 0,29           | 0,83        | 0,25       | 0,81        | 0,05        | 0,25       |
| <i>Ccl6</i>          | 2,145          | 1,461       | 2,608      | 1,147       | 1,105       | 1,341      | 2,281          | 2,394       | 3,203      | 1,848       | 0,989       | 1,000      |
| SE                   | 0,63           | 0,17        | 0,91       | 0,09        | 0,20        | 0,14       | 0,84           | 0,87        | 1,41       | 0,61        | 0,16        | 0,11       |
| <i>Ccl7</i>          | 6,126          | 2,718       | 9,581**    | 0,651       | 0,479       | 0,678      | 2,407          | 2,587       | 2,812      | 2,078       | 0,813       | 1,000      |
| SE                   | 2,52           | 1,27        | 3,35       | 0,14        | 0,08        | 0,12       | 0,57           | 0,91        | 0,36       | 1,40        | 0,12        | 0,10       |
| <i>Ccl9</i>          | 0,214          | 0,153       | 0,193      | 0,199       | 0,320       | 0,130      | 0,535          | 0,514       | 0,535      | 0,668       | 0,265       | 1,000      |
| SE                   | 0,08           | 0,04        | 0,05       | 0,05        | 0,16        | 0,02       | 0,24           | 0,18        | 0,22       | 0,24        | 0,20        | 0,38       |
| <i>Ccl11</i>         | 1,296          | 1,519       | 3,381      | 1,552       | 0,757       | 1,241      | 2,108          | 1,539       | 1,305      | 1,251       | 1,711       | 1,000      |
| SE                   | 0,27           | 0,16        | 1,75       | 0,28        | 0,19        | 0,24       | 0,38           | 0,23        | 0,23       | 0,26        | 0,49        | 0,26       |
| <i>Ccl12</i>         | 21,583         | 10,616      | 17,314     | 0,792       | 1,039       | 1,046      | 14,206         | 16,178      | 25,334*    | 1,540       | 2,065       | 1,000      |
| SE                   | 5,52           | 3,75        | 7,11       | 0,20        | 0,22        | 0,24       | 5,14           | 6,41        | 11,99      | 0,73        | 1,03        | 0,25       |
| <i>Ccl17</i>         | 1,475***       | 2,767***    | 1,537      | 0,378       | 0,821       | 0,698      | 5,482          | 5,396       | 3,534      | 1,605       | 0,454       | 1,000      |
| SE                   | 0,17           | 0,64        | 0,32       | 0,07        | 0,29        | 0,25       | 1,29           | 1,65        | 0,36       | 0,74        | 0,02        | 0,31       |
| <i>Ccl19</i>         | 0,023          | 0,016       | 0,220      | 0,041       | 0,010       | 0,015      | 0,499          | 0,273       | 0,416      | 0,635       | 0,485       | 1,000      |
| SE                   | 0,01           | 0,00        | 0,21       | 0,03        | 0,00        | 0,00       | 0,28           | 0,26        | 0,40       | 0,39        | 0,48        | 0,41       |
| <i>Ccl20</i>         | 0,310          | 0,386       | 0,207      | 0,257       | 0,616       | 0,355      | 0,327          | 0,752       | 0,263      | 0,765       | 0,247       | 1,000      |
| SE                   | 0,13           | 0,09        | 0,08       | 0,03        | 0,17        | 0,12       | 0,18           | 0,42        | 0,07       | 0,28        | 0,05        | 0,48       |
| <i>Ccl22</i>         | 0,663          | 1,041       | 0,229      | 0,809       | 3,007       | 1,098      | 1,887          | 2,515       | 1,880      | 1,566       | 0,571       | 1,000      |
| SE                   | 0,37           | 0,23        | 0,06       | 0,14        | 1,46        | 0,35       | 0,80           | 1,11        | 0,67       | 0,60        | 0,20        | 0,35       |
| <i>Ccl24</i>         | 0,901          | 1,105       | 0,569      | 1,462       | 0,923       | 0,888      | 0,769          | 0,884       | 0,739      | 1,108       | 0,852       | 1,000      |
| SE                   | 0,23           | 0,06        | 0,16       | 0,29        | 0,09        | 0,12       | 0,15           | 0,22        | 0,20       | 0,09        | 0,21        | 0,13       |
| <i>Cxcl6</i>         | 15,405         | 3,969       | 23,984*    | 0,591       | 0,389       | 0,665      | 2,599          | 2,504       | 2,598      | 1,773       | 0,477       | 1,000      |
| SE                   | 9,34           | 1,83        | 12,04      | 0,18        | 0,09        | 0,29       | 0,44           | 0,37        | 1,03       | 0,72        | 0,08        | 0,24       |
| <i>Cxcl12</i>        | 0,974          | 1,061       | 1,406      | 1,538       | 1,218       | 1,082      | 0,741          | 0,977       | 1,084      | 1,131       | 1,199       | 1,000      |
| SE                   | 0,29           | 0,16        | 0,12       | 0,23        | 0,19        | 0,16       | 0,20           | 0,33        | 0,30       | 0,08        | 0,28        | 0,21       |
| <i>Cx3cl1</i>        | 0,982          | 0,200       | 0,084      | 1,722       | 1,630       | 0,808      | 0,091          | 0,438       | 0,207      | 1,173       | 0,963       | 1,000      |
| SE                   | 0,63           | 0,02        | 0,02       | 0,83        | 0,68        | 0,61       | 0,03           | 0,28        | 0,14       | 0,59        | 0,82        | 0,46       |

**Table S3.** Relative gene expression of chemokine receptors (Mean  $\pm$  SE). \* Significantly different from the control  $\beta$ G- group at the same time point according to the Dunnett post hoc test (\*\* $p < 0.01$ , \*\*\* $p < 0.001$ ).

| Time                 | 3 days         |               |               |               |               |               | 7 days           |                 |                  |               |               |               |
|----------------------|----------------|---------------|---------------|---------------|---------------|---------------|------------------|-----------------|------------------|---------------|---------------|---------------|
| Colon inflammation   | <i>colitis</i> |               |               | control       |               |               | <i>colitis</i>   |                 |                  | control       |               |               |
| Dietary intervention | $\beta$ GI+    | $\beta$ Gh+   | $\beta$ G-    | $\beta$ GI+   | $\beta$ Gh+   | $\beta$ G-    | $\beta$ GI+      | $\beta$ Gh+     | $\beta$ G-       | $\beta$ GI+   | $\beta$ Gh+   | $\beta$ G-    |
| <i>Ccr3</i><br>SE    | 1,559<br>0,38  | 2,184<br>0,52 | 2,536<br>0,35 | 1,295<br>0,14 | 0,993<br>0,20 | 1,242<br>0,14 | 3,143***<br>0,49 | 3,026**<br>0,58 | 3,122***<br>0,19 | 1,167<br>0,23 | 0,917<br>0,20 | 1,000<br>0,18 |
| <i>Ccr4</i><br>SE    | 0,827<br>0,34  | 0,593<br>0,20 | 1,300<br>0,94 | 0,377<br>0,10 | 0,312<br>0,06 | 0,264<br>0,04 | 1,129<br>0,43    | 1,338<br>0,30   | 0,869<br>0,44    | 1,147<br>0,38 | 0,634<br>0,59 | 1,000<br>0,46 |
| <i>Ccr6</i><br>SE    | 0,088<br>0,02  | 0,088<br>0,02 | 0,132<br>0,06 | 0,126<br>0,04 | 0,103<br>0,06 | 0,098<br>0,01 | 0,682<br>0,34    | 0,800<br>0,40   | 0,396<br>0,15    | 0,654<br>0,30 | 0,294<br>0,19 | 1,000<br>0,42 |
| <i>Ccr8</i><br>SE    | 1,656<br>0,70  | 1,139<br>0,32 | 1,627<br>0,78 | 0,786<br>0,16 | 1,823<br>1,24 | 0,435<br>0,31 | 1,336<br>0,40    | 2,443<br>1,20   | 1,216<br>0,59    | 0,624<br>0,39 | 0,783<br>0,00 | 1,000<br>0,48 |
| <i>Ccr10</i><br>SE   | 0,763<br>0,37  | 0,757<br>0,12 | 0,728<br>0,29 | 2,122<br>0,46 | 1,618<br>0,24 | 1,246<br>0,24 | 0,787<br>0,18    | 0,755<br>0,18   | 0,743<br>0,24    | 1,212<br>0,44 | 0,813<br>0,38 | 1,000<br>0,26 |
| <i>Cxcr1</i><br>SE   | 1,533<br>0,38  | 0,978<br>0,29 | 2,026<br>0,58 | 1,853<br>0,37 | 1,076<br>0,18 | 1,485<br>0,34 | 1,845<br>0,48    | 1,772<br>0,33   | 0,935<br>0,19    | 1,415<br>0,41 | 1,010<br>0,22 | 1,000<br>0,47 |
| <i>Cxcr3</i><br>SE   | 0,622<br>0,39  | 0,599<br>0,21 | 0,990<br>0,61 | 0,613<br>0,15 | 0,788<br>0,33 | 0,300<br>0,12 | 0,925<br>0,27    | 0,857<br>0,15   | 0,743<br>0,23    | 0,795<br>0,19 | 0,774<br>0,57 | 1,000<br>0,35 |
| <i>Cxcr5</i><br>SE   | 0,048<br>0,01  | 0,115<br>0,08 | 0,222<br>0,16 | 0,115<br>0,03 | 0,096<br>0,03 | 0,057<br>0,02 | 0,123<br>0,05    | 0,071<br>0,03   | 0,132<br>0,07    | 0,557<br>0,32 | 0,019<br>0,00 | 1,000<br>0,45 |
| <i>Cx3cr1</i><br>SE  | 0,989<br>0,36  | 0,826<br>0,04 | 1,052<br>0,20 | 0,719<br>0,10 | 0,557<br>0,16 | 0,713<br>0,10 | 0,995<br>0,20    | 0,967<br>0,20   | 0,659<br>0,10    | 0,616<br>0,05 | 0,523<br>0,20 | 1,000<br>0,25 |
